# Supplementary material for: Quantitative peptidomics of endogenous peptides involved in TGF-β1-induced epithelial mesenchymal transition of renal epithelial cells
Source: PubMed Central journal article supplement (PMC5841401; doi:10.1038/s41420-017-0001-x), 2018-02-06
Supplement: 41420_2017_1_MOESM1_ESM.pdf [file 41420_2017_1_MOESM1_ESM.pdf]

## SUPPLEMENTARY TABLES S1-S3

Quantitative peptidomics of endogenous peptides involved in TGF- $\beta$ 1-induced epithelial mesenchymal transition of renal epithelial cells

Rattiyaporn Kanlaya and Visith Thongboonkerd\*

\*Correspondence to: [thongboonkerd@dr.com](mailto:thongboonkerd@dr.com) (or) [ythongbo@yahoo.com](mailto:ythongbo@yahoo.com)Supplementary Table S1. Summary of unique endogenous peptides that were significantly altered in TGF- $\beta$ 1-treated HK-2 cells.

| Accession                                                                                                                        | Precursor protein                        | Peptide                  | Ratio <sup>a</sup><br>(TGF- $\beta$ 1<br>/Control) | Cleavage<br>site | Responsible proteolytic enzyme(s) reported in MEROPs <sup>b</sup> and<br>TopFINDER <sup>c</sup> |
|----------------------------------------------------------------------------------------------------------------------------------|------------------------------------------|--------------------------|----------------------------------------------------|------------------|-------------------------------------------------------------------------------------------------|
| <b><u>Peptides with significantly decreased levels in TGF-<math>\beta</math>1-treated HK-2 cells (in alphabetical order)</u></b> |                                          |                          |                                                    |                  |                                                                                                 |
| P61604                                                                                                                           | 10 kDa heat shock protein, mitochondrial | AAETVTKGGIMLPEKSQ GK     | 0.03                                               | Internal         | Matriptase-2/meprin beta subunit                                                                |
|                                                                                                                                  |                                          | AAETVTKGGIMLPEKSQ GKVLQA | 0.01                                               | Internal         | Matriptase-2/meprin beta subunit                                                                |
|                                                                                                                                  |                                          | AVGSGSKGKGGEIQPVSV       | 0.26                                               | Internal         | Cathepsin S/matrix metalloproteinase-2                                                          |
|                                                                                                                                  |                                          | TVVAVGSGSKGKGGEIQPVSV    | 0.21                                               | Internal         | Meprin beta subunit/matrix metalloproteinase-2                                                  |
|                                                                                                                                  |                                          | QATVVAVGSGSKGKGGEIQPVSV  | 0.20                                               | Internal         | Meprin beta subunit/matrix metalloproteinase-2                                                  |
|                                                                                                                                  |                                          | DGDILGKYVD               | 0.16                                               | C-terminal       | Unknown protease                                                                                |
|                                                                                                                                  |                                          | VGSGSKGKGGEIQPVSV        | 0.01                                               | Internal         | Cathepsin S/matrix metalloproteinase-2                                                          |
|                                                                                                                                  |                                          | RDGDILGKYVD              | 0.06                                               | C-terminal       | Unknown protease                                                                                |
|                                                                                                                                  |                                          | AAETVTKGGIML             | 0.39                                               | Internal         | Matriptase-2/peptidyl-Lys metalloproteinase                                                     |
|                                                                                                                                  |                                          | KVGDKVLLPE               | 0.14                                               | Internal         | Matrix metalloproteinase-2/glutamyl peptidase 1                                                 |
|                                                                                                                                  |                                          | AAETVTKG                 | 0.27                                               | Internal         | Matriptase-2/no report                                                                          |
|                                                                                                                                  |                                          | AETVTKGGIML              | 0.28                                               | Internal         | Matriptase-2/peptidyl-Lys metalloproteinase                                                     |
|                                                                                                                                  |                                          | GSGSKGKGGEIQPVSV         | 0.33                                               | Internal         | Cathepsin S/matrix metalloproteinase-2                                                          |
|                                                                                                                                  |                                          | AAETVTKGGI               | 0.41                                               | Internal         | Matriptase-2/no report                                                                          |
|                                                                                                                                  |                                          | SAAETVTKGGIML            | 0.64                                               | Internal         | Matriptase-2/peptidyl-Lys metalloproteinase?                                                    |
| Q9NWU5                                                                                                                           | 39S ribosomal protein L22, mitochondrial | LVEGPPPPPEPKTA           | 0.54                                               | Internal         | No information about this protein                                                               |
| P63220                                                                                                                           | 40S ribosomal protein S21                | MGESDDSLRL               | 0.01                                               | Internal         | Unknown protease                                                                                |
|                                                                                                                                  |                                          | AKADGIVSKNF              | 0.22                                               | C-terminal       | Human airway trypsin-like peptidase, DESC1 peptidase, thrombin                                  |
|                                                                                                                                  |                                          | DGIVSKNF                 | 0.27                                               | C-terminal       | Human airway trypsin-like peptidase, DESC1 peptidase, thrombin                                  |
|                                                                                                                                  |                                          | ADGIVSKNF                | 0.26                                               | C-terminal       | Human airway trypsin-like peptidase, DESC1 peptidase, thrombin                                  |

|        |                                                       |                    |      |            |                                                   |
|--------|-------------------------------------------------------|--------------------|------|------------|---------------------------------------------------|
| P62899 | 60S ribosomal protein L31                             | YVPVTTFKNLQTVNVDEN | 0.01 | C-terminal | Unknown protease                                  |
| P63261 | Actin, cytoplasmic 2                                  | FAGDDAPR           | 0.41 | Internal   | Unknown protease/trypsin 1                        |
| P27144 | Adenylate kinase 4, mitochondrial                     | IAQNFGQLQH         | 0.01 | Internal   | Unknown protease                                  |
| P18825 | Alpha-2C adrenergic receptor                          | VKATLV             | 0.50 | Internal   | No information about this protein                 |
| Q6NUK1 | Calcium-binding mitochondrial carrier protein SCaMC-1 | QIASYPLALVR        | 0.10 | Internal   | No information about this protein                 |
|        |                                                       | QLASYPLALVR        | 0.01 | Internal   | No information about this protein                 |
|        |                                                       | IISKEGIPGLYRG      | 0.12 | Internal   | No information about this protein                 |
|        |                                                       | VVYENMKQTLG        | 0.50 | Internal   | No information about this protein                 |
| P07339 | Cathepsin D                                           | GEATKQPGITGI       | 0.53 | Internal   | Unknown protease                                  |
|        |                                                       | RDPDAQPGGELM       | 0.41 | Internal   | Unknown protease                                  |
|        |                                                       | VGGSVEDLIAKGPV     | 0.01 | Internal   | Unknown protease                                  |
| Q9BXS0 | Collagen alpha-1(XXV) chain                           | AGKGGGR            | 0.01 | Internal   | Unknown protease                                  |
| P78310 | Coxsackievirus and adenovirus receptor                | AIPVMIPAQSKDGSIV   | 0.09 | C-terminal | No information about this protein                 |
| P14927 | Cytochrome b-c1 complex subunit 7                     | AAGFNK             | 0.21 | Internal   | No information about this protein                 |
| P20674 | Cytochrome c oxidase subunit 5A, mitochondrial        | GISTPEELGLDKV      | 0.25 | C-terminal | Glutamyl peptidase 1                              |
| P53634 | Dipeptidyl peptidase 1                                | DPFNPFEELTNH       | 0.01 | Internal   | Cathepsin L/unknown protease                      |
| P30040 | Endoplasmic reticulum resident protein 29             | ALPLDVTVFYK        | 0.06 | Internal   | Unknown protease                                  |
|        |                                                       | AGEFIRASGVEARQA    | 0.30 | Internal   | RC1339 q.p. ( <i>Rickettsia conorii</i> )         |
| P04792 | Heat shock protein beta-1                             | TLPPGVDPTQVSSSL    | 0.35 | Internal   | Unknown protease                                  |
| Q9NXK6 | Membrane progesterin receptor gamma                   | YGAVNLFSLGSAIAYSA  | 0.01 | Internal   | No information about this protein                 |
| P22307 | Non-specific lipid-transfer protein                   | QNLQLQPGNAKL       | 0.14 | C-terminal | Unknown protease                                  |
|        |                                                       | NLQLQPGNAKL        | 0.01 | C-terminal | Unknown protease                                  |
|        |                                                       | LQNLQLQPGNAKL      | 0.20 | C-terminal | Unknown protease                                  |
| P04181 | Ornithine aminotransferase, mitochondrial             | ALEVLEENLAENADK    | 0.36 | Internal   | Unknown protease                                  |
| O00151 | PDZ and LIM domain protein 1                          | SPASSTTARVITNQY    | 0.01 | Internal   | Unknown protease                                  |
| P62937 | Peptidyl-prolyl cis-trans isomerase A                 | DIAVDGEPLGRVSF     | 0.02 | Internal   | MAM peptidase, cathepsin S/L/meprin alpha subunit |
|        |                                                       | AVDGEPLGRVSF       | 0.16 | Internal   | Cathepsin S/L/meprin alpha subunit                |
|        |                                                       | STGEKGFY           | 0.24 | Internal   | Unknown protease                                  |
|        |                                                       | KHTGPGILSM         | 0.41 | Internal   | peptidyl-Lys metallopeptidase/unknown protease    |
| P62942 | Peptidyl-prolyl cis-trans isomerase FKBP1A            | DVELLKLE           | 0.37 | C-terminal | Unknown protease                                  |
| P30044 | Peroxiredoxin-5, mitochondrial                        | APIKVGDAIPAVEVF    | 0.01 | Internal   | M24 homologue (unknown peptidase)                 |

|        |                                                    |                    |      |            |                                   |
|--------|----------------------------------------------------|--------------------|------|------------|-----------------------------------|
| Q8WW12 | PEST proteolytic signal-containing nuclear protein | LGNVHDQDN          | 0.01 | C-terminal | Unknown protease                  |
| Q9Y4D7 | Plexin-D1                                          | DDNILKI            | 0.28 | Internal   | No information about this protein |
| Q99471 | Prefoldin subunit 5                                | TALGAAQATAKA       | 0.63 | C-terminal | Matrix metalloproteinase-2        |
| P07737 | Profilin-1                                         | STGGAPTFNVTVTKT    | 0.35 | Internal   | Trypsin1/trypsin1                 |
| P28072 | Proteasome subunit beta type-6                     | RSGSAADTQAVADAVTY  | 0.51 | Internal   | Unknown protease                  |
| Q99436 | Proteasome subunit beta type-7                     | GGVDVTGPHLY        | 0.53 | Internal   | Cathepsin L                       |
| Q9NY59 | Sphingomyelin phosphodiesterase 3                  | NKCNDALASKGALFLKVQ | 0.01 | Internal   | No information about this protein |
| P04179 | Superoxide dismutase [Mn], mitochondrial           | GDVTAQIALQPALK     | 0.01 | Internal   | No information about this protein |
| P31431 | Syndecan-4                                         | GSGSQVPTEPK        | 0.01 | Internal   | Unknown protease                  |
| P08670 | Vimentin                                           | GGPGTASRPSS        | 0.58 | Internal   | Unknown protease                  |
|        |                                                    | ASSPGGVYATRS       | 0.59 | Internal   | Trypsin1/matrix metalloproteinase |
|        |                                                    | GGPGTASRPS         | 0.55 | Internal   | Unknown protease                  |
| Q5SVQ8 | Zinc finger and BTB domain-containing protein 41   | SHEILSP            | 0.01 | Internal   | No information about this protein |

***Peptides with significantly increased levels in TGF- $\beta$ 1-treated HK-2 cells (in alphabetical order)***

|        |                                               |                            |        |            |                                      |
|--------|-----------------------------------------------|----------------------------|--------|------------|--------------------------------------|
| Q9H251 | Cadherin-23                                   | ATVLFNLNATDLDRSREYQGESIYSL | 100.00 | Internal   | No information about this protein    |
| O14493 | Claudin-4                                     | YSAARSAASNYV               | 1.44   | C-terminal | No information about this protein    |
| P02751 | Fibronectin                                   | ETPSQPNSHPI                | 2.66   | Internal   | Matrix metalloproteinase-9,-3,-12,-8 |
|        |                                               | VRPSQGGEAPR                | 3.89   | Internal   | Unknown protease                     |
| P08729 | Keratin, type II cytoskeletal 7               | QESEQIKTLN                 | 5.07   | Internal   | Unknown protease                     |
| Q4W5G0 | Tigger transposable element-derived protein 2 | GIPKAAGK                   | 100.00 | Internal   | No information about this protein    |

<sup>a</sup> Ratio = 0.01 represents the peptides that were absent in the TGF- $\beta$ 1-treated cells, whereas Ratio = 100 denotes newly presented peptides in the TGF- $\beta$ 1-treated cells.

<sup>b</sup> The database of proteolytic enzymes, substrates, and inhibitors.

<sup>c</sup> The database for characterizes and annotates proteomics-derived N- or C-termini sets for their origin, sequence context and implications for protein structure and function.

**Supplementary Table S2.** Summary of the identified endogenous peptides that were also found in DagraBase database.

| Accession | Precursor protein                          | Start residue | Peptide              | Conditions    |                 |                  |
|-----------|--------------------------------------------|---------------|----------------------|---------------|-----------------|------------------|
|           |                                            |               |                      | Healthy cells | Apoptotic cells | This study (EMT) |
| P61604    | 10 kDa heat shock protein, mitochondrial   | 21            | SAAETVTK             | ✓             | ✓               | ✓                |
| P61604    | 10 kDa heat shock protein, mitochondrial   | 21            | SAAETVTKGGIML        | ✓             | ✓               | ✓                |
| P61604    | 10 kDa heat shock protein, mitochondrial   | 45            | TVVAVGSGSKGKGGEIQVSV | ✓             | ✓               | ✓                |
| P61604    | 10 kDa heat shock protein, mitochondrial   | 48            | AVGSGSKGKGGEIQVSV    | ✓             | ✓               | ✓                |
| P62942    | Peptidyl-prolyl cis-trans isomerase FKBP1A | 101           | DVELLKLE             | ND            | ✓               | ✓                |
| P30044    | Peroxiredoxin-5, mitochondrial             | 54            | APIKVGDAIPAVEVF      | ✓             | ✓               | ✓                |
| P07737    | Profilin-1                                 | 91            | STGGAPTFNVTVTKT      | ND            | ✓               | ✓                |
| P08670    | Vimentin                                   | 16            | GGPGTASRPS           | ND            | ✓               | ✓                |
| P08670    | Vimentin                                   | 16            | GGPGTASRPSS          | ND            | ✓               | ✓                |

✓ = Detectable or found.

ND = Not determined.

**Supplementary Table S3.** Summary of unique endogenous peptides that were significantly altered in MG132-treated HK-2 cells.

| Accession                                                                                                      | Precursor protein                                     | Peptide                  | Ratio <sup>a</sup><br>(MG132/<br>Control) |
|----------------------------------------------------------------------------------------------------------------|-------------------------------------------------------|--------------------------|-------------------------------------------|
| <b><i>Peptides with significantly decreased levels in MG132-treated HK-2 cells (in alphabetical order)</i></b> |                                                       |                          |                                           |
| P61604                                                                                                         | 10 kDa heat shock protein, mitochondrial              | AAETVTKGGIML             | 0.14                                      |
|                                                                                                                |                                                       | AAETVTKGGIMLPEKSQGKVLQA  | 0.24                                      |
|                                                                                                                |                                                       | RDGDILGK                 | 0.34                                      |
|                                                                                                                |                                                       | SAAETVTKGGIMLPEKSQGKVLQA | 0.39                                      |
|                                                                                                                |                                                       | AVGSGSKGKGGEIQPVSV       | 0.41                                      |
|                                                                                                                |                                                       | QATVAVGSGSKGKGGEIQPVSV   | 0.41                                      |
|                                                                                                                |                                                       | TVVAVGSGSKGKGGEIQPVSV    | 0.42                                      |
|                                                                                                                |                                                       | RDGDILGKYVD              | 0.44                                      |
|                                                                                                                |                                                       | TVVAVGSGSKGKGGEIQPVSVKV  | 0.52                                      |
|                                                                                                                |                                                       | DGDILGKYVD               | 0.89                                      |
|                                                                                                                |                                                       | SAAETVTK                 | 0.89                                      |
| P62333                                                                                                         | 26S protease regulatory subunit 10B                   | HAGPITK                  | 0.62                                      |
| P62191                                                                                                         | 26S protease regulatory subunit 4                     | VGSELIQKY                | 0.17                                      |
|                                                                                                                |                                                       | GSELIQKY                 | 0.44                                      |
| P62195                                                                                                         | 26S protease regulatory subunit 8                     | EIDSIGSSRL               | 0.30                                      |
| Q9Y399                                                                                                         | 28S ribosomal protein S2, mitochondrial               | EPGDQGAHPPG              | 0.47                                      |
| P82650                                                                                                         | 28S ribosomal protein S22, mitochondrial              | AESGSPETKKPT             | 0.33                                      |
|                                                                                                                |                                                       | SSEAAESGSPETKKPT         | 0.83                                      |
| Q9NWU5                                                                                                         | 39S ribosomal protein L22, mitochondrial              | VEGPPPPPEPPKTA           | 0.69                                      |
| P63220                                                                                                         | 40S ribosomal protein S21                             | MGESDDSilRL              | 0.02                                      |
|                                                                                                                |                                                       | GESDDSilRL               | 0.17                                      |
|                                                                                                                |                                                       | AKADGIVSKNF              | 0.18                                      |
|                                                                                                                |                                                       | DGIVSKNF                 | 0.35                                      |
|                                                                                                                |                                                       | KADGIVSKNF               | 0.59                                      |
|                                                                                                                |                                                       | ADGIVSKNF                | 0.63                                      |
| P62899                                                                                                         | 60S ribosomal protein L31                             | KNLQTVNVN DEN            | 0.37                                      |
| P62917                                                                                                         | 60S ribosomal protein L8                              | GTKTVQEKEN               | 0.31                                      |
| Q8IZT6                                                                                                         | Abnormal spindle-like microcephaly-associated protein | IVIQKY                   | 0.15                                      |
| P60709                                                                                                         | Actin, cytoplasmic 1                                  | ALPHAILRL                | 0.02                                      |
|                                                                                                                |                                                       | ALPHALL                  | 0.23                                      |
|                                                                                                                |                                                       | ALPHAIL                  | 0.28                                      |
|                                                                                                                |                                                       | EAPLNPK                  | 0.41                                      |
|                                                                                                                |                                                       | DESGPSIVHR               | 0.43                                      |
|                                                                                                                |                                                       | VAPEEHPV                 | 0.50                                      |
|                                                                                                                |                                                       | ISKQEYDESGPSIVHR         | 0.57                                      |
|                                                                                                                |                                                       | ISKQEYDESGPSIVH          | 0.82                                      |
| Q8IZF6                                                                                                         | Adhesion G-protein coupled receptor G4                | THFGVL                   | 0.67                                      |
| O75947                                                                                                         | ATP synthase subunit d, mitochondrial                 | AEIIPQNQKAIASSL          | 0.65                                      |
| P56381                                                                                                         | ATP synthase subunit epsilon, mitochondrial           | ANAECTSGSNVK             | 0.32                                      |
| P61769                                                                                                         | Beta-2-microglobulin                                  | IQRTPKIQVY               | 0.40                                      |
| P55285                                                                                                         | Cadherin-6                                            | LIHPTGLSTGAL             | 0.36                                      |
|                                                                                                                |                                                       | LIHPTGLSTGALV            | 0.47                                      |
| Q6NUK1                                                                                                         | Calcium-binding mitochondrial carrier protein SCaMC-1 | QIASYPLALVR              | 0.10                                      |
|                                                                                                                |                                                       | LASYPLALVR               | 0.26                                      |
|                                                                                                                |                                                       | QLASYPLALVR              | 0.33                                      |
|                                                                                                                |                                                       | IASYPLALVR               | 0.35                                      |
|                                                                                                                |                                                       | ASYPLALVR                | 0.67                                      |

|        |                                                 |                         |      |
|--------|-------------------------------------------------|-------------------------|------|
|        |                                                 | IISKEGIPGLYRG           | 0.71 |
| P07858 | Cathepsin B                                     | IESEVVAGIPRTD           | 0.12 |
| P07339 | Cathepsin D                                     | SRDPDAQPGGELM           | 0.01 |
|        |                                                 | SRDPDAQPGGELML          | 0.01 |
|        |                                                 | VFGEATKQPGITF           | 0.01 |
|        |                                                 | DNNRVGFAEAAAR           | 0.04 |
|        |                                                 | YTVFDR                  | 0.04 |
|        |                                                 | YTVFDRD                 | 0.06 |
|        |                                                 | FDRDNNRVGFAEAAAR        | 0.08 |
|        |                                                 | EGPIPEVLK               | 0.09 |
|        |                                                 | NNRVGFAEAAAR            | 0.10 |
|        |                                                 | GGVKVERQ                | 0.12 |
|        |                                                 | NNRVGFAEAA              | 0.12 |
|        |                                                 | TVFDRD                  | 0.12 |
|        |                                                 | GPIPEVLK                | 0.19 |
| Q96M83 | Coiled-coil domain-containing protein 7         | RFEELKNRLKQRSKSSVKVMSLK | 0.03 |
| P42771 | Cyclin-dependent kinase inhibitor 2A            | ARIDAAEGPSDIPD          | 0.02 |
| P20674 | Cytochrome c oxidase subunit 5A, mitochondrial  | GISTPEELGLDKV           | 0.44 |
| P10606 | Cytochrome c oxidase subunit 5B, mitochondrial  | ASGGGVPTDEEQATGLE       | 0.64 |
|        |                                                 | GGVPTDEEQATGLE          | 0.83 |
| P12074 | Cytochrome c oxidase subunit 6A1, mitochondrial | HNPHVNPLPTGYEDE         | 0.78 |
| P53634 | Dipeptidyl peptidase 1                          | AVAATPIPKL              | 0.32 |
|        |                                                 | DPFNPFELTNH             | 0.48 |
|        |                                                 | FNPFELTNH               | 0.50 |
| Q9NS91 | E3 ubiquitin-protein ligase RAD18               | EAKRPEPPSTSTL           | 0.59 |
| P24534 | Elongation factor 1-beta                        | GFGDLKSPAGLQVL          | 0.01 |
|        |                                                 | GFGDLKSPAGLQV           | 0.17 |
| P84090 | Enhancer of rudimentary homolog                 | LRRQAQQAGK              | 0.49 |
| P29317 | Ephrin type-A receptor 2                        | LTQEGQGAGSKVHEFQT       | 0.81 |
| P41567 | Eukaryotic translation initiation factor 1      | AKDDQLKVHGF             | 0.09 |
| Q15056 | Eukaryotic translation initiation factor 4H     | ANPNSAIFGGARPREE        | 0.23 |
|        |                                                 | ATPLNQVANPNSAIFGGARPREE | 0.33 |
|        |                                                 | VVQKEQE                 | 0.59 |
| P63241 | Eukaryotic translation initiation factor 5A-1   | AVAIKAMAK               | 0.12 |
|        |                                                 | SAMTEEAAVAIKAMAK        | 0.13 |
| Q93063 | Exostosin-2                                     | ESVLVLDK                | 0.20 |
| P09382 | Galectin-1                                      | GEVAPDAKSFVLNL          | 0.02 |
|        |                                                 | GEVAPDAKSFVL            | 0.32 |
| O94925 | Glutaminase kidney isoform, mitochondrial       | AAPGPKDGPGETDA          | 0.72 |
| P50440 | Glycine amidinotransferase, mitochondrial       | AADFIRA                 | 0.47 |
| P04792 | Heat shock protein beta-1                       | DVNHFAPEL               | 0.02 |
|        |                                                 | GGSSWPGYVR              | 0.17 |
|        |                                                 | RVSLDVNHF               | 0.19 |
|        |                                                 | LGGSSWPGYVR             | 0.22 |
|        |                                                 | ESRAQLGGPEAAKSDETAAK    | 0.23 |
|        |                                                 | SRALSRQL                | 0.24 |
|        |                                                 | QLGGPEAAKSDETAAK        | 0.26 |
|        |                                                 | TLPPGVDPTQVSSSL         | 0.28 |
|        |                                                 | SLDVNHF                 | 0.36 |
|        |                                                 | SSGVSEIRH               | 0.46 |
|        |                                                 | SSGVSEIRHT              | 0.48 |
|        |                                                 | LGGPEAAKSDETAAK         | 0.59 |
| P05787 | Keratin, type II cytoskeletal 8                 | ESSDVLPK                | 0.67 |

|        |                                                                             |                       |      |
|--------|-----------------------------------------------------------------------------|-----------------------|------|
| P10619 | Lysosomal protective protein                                                | FVESQKDPENSPVVL       | 0.01 |
|        |                                                                             | YGDSGEQIAGFVKE        | 0.02 |
|        |                                                                             | YGDSGEQIAGFVK         | 0.03 |
|        |                                                                             | APDQDEIQRLPGLA        | 0.03 |
|        |                                                                             | DQDEIQRLPG            | 0.10 |
|        |                                                                             | DQDEIQRLPGLA          | 0.13 |
|        |                                                                             | DSGEQIAGFVKE          | 0.28 |
|        |                                                                             | DQDEIQRLPGLAK         | 0.77 |
| P35579 | Myosin-9                                                                    | GDLPFVVPR             | 0.30 |
| Q9UI09 | NADH dehydrogenase [ubiquinone] 1 alpha subcomplex subunit 12               | TDDPPTTKPLTA          | 0.71 |
| Q16795 | NADH dehydrogenase [ubiquinone] 1 alpha subcomplex subunit 9, mitochondrial | AEIEDVKPA             | 0.77 |
| P22307 | Non-specific lipid-transfer protein                                         | QLQPGNAKL             | 0.39 |
|        |                                                                             | QNLQLQPGNAKL          | 0.40 |
|        |                                                                             | LQNLQLQPGNAKL         | 0.67 |
|        |                                                                             | NLQLQPGNAKL           | 0.70 |
| Q9Y5B8 | Nucleoside diphosphate kinase 7                                             | EGILGK                | 0.67 |
| P50897 | Palmitoyl-protein thioesterase 1                                            | LATEGDHLQ             | 0.07 |
| Q96JY6 | PDZ and LIM domain protein 2                                                | YSAPATLSSRA           | 0.50 |
| P62937 | Peptidyl-prolyl cis-trans isomerase A                                       | DIAVDGEPLGRVSF        | 0.01 |
|        |                                                                             | EDENFILKHTGPGILSM     | 0.01 |
|        |                                                                             | ELFADKVPKTAENF        | 0.02 |
|        |                                                                             | ELFADKVPKTAEN         | 0.07 |
|        |                                                                             | AVDGEPLGRVSF          | 0.12 |
|        |                                                                             | ANAGPNTNGSQFF         | 0.13 |
|        |                                                                             | ANAGPNTNGSQF          | 0.16 |
|        |                                                                             | DGEPLGRVSF            | 0.17 |
|        |                                                                             | EDENFILKH             | 0.18 |
|        |                                                                             | VDGEPLGRVSF           | 0.22 |
|        |                                                                             | KHTGPGLLSM            | 0.26 |
|        |                                                                             | KHTGPGILSM            | 0.27 |
|        |                                                                             | STGEKGFGY             | 0.29 |
| P62942 | Peptidyl-prolyl cis-trans isomerase FKBP1A                                  | DVELLKE               | 0.17 |
| P30044 | Peroxiredoxin-5, mitochondrial                                              | IKVGD AIPAVEVF        | 0.01 |
|        |                                                                             | APIKVGDAIPAVEVF       | 0.04 |
|        |                                                                             | EGEPGNKVNL            | 0.22 |
| P30086 | Phosphatidylethanolamine-binding protein 1                                  | AGAAVDELGKVLTPQV      | 0.01 |
| O00625 | Pirin                                                                       | TAGRGIL               | 0.35 |
| O60828 | Polyglutamine-binding protein 1                                             | ANAEASRTKQQD          | 0.78 |
| P26599 | Polypyrimidine tract-binding protein 1                                      | RIIVENL               | 0.37 |
|        |                                                                             | RLIVENL               | 0.39 |
| Q99471 | Prefoldin subunit 5                                                         | TALGAAQATAKA          | 0.25 |
| P07737 | Profilin-1                                                                  | STGGAPTFNVTVTKT       | 0.02 |
| Q15185 | Prostaglandin E synthase 3                                                  | VEDSKDVNVNF           | 0.02 |
| P28072 | Proteasome subunit beta type-6                                              | RSGSAADTQAVADAVTY     | 0.31 |
| Q99497 | Protein DJ-1                                                                | AGPTALLAHEI           | 0.13 |
| P60903 | Protein S100-A10                                                            | QKDPLAVDKI            | 0.24 |
| Q7Z7A4 | PX domain-containing protein kinase-like protein                            | AKPKDPFLKKYCNPKKIQ    | 0.01 |
| P98179 | RNA-binding protein 3                                                       | NTDEQALEDHF           | 0.10 |
|        |                                                                             | TNPEHASVAMR           | 0.23 |
| P42345 | Serine/threonine-protein kinase mTOR                                        | IGDGLVKP              | 0.37 |
| P63313 | Thymosin beta-10                                                            | NTLPTKETIEQEKRSIS     | 0.09 |
|        |                                                                             | ETQEKNLPTKETIEQEKRSIS | 0.19 |

|                     |                                        |                         |      |
|---------------------|----------------------------------------|-------------------------|------|
| P62328              | Thymosin beta-4                        | TETQEKNPSPKETIEQEKQAGES | 0.01 |
|                     |                                        | NPLPSKETIEQEKQAGES      | 0.19 |
|                     |                                        | TQEKNPSPKETIEQEKQAGES   | 0.29 |
|                     |                                        | ETQEKNPSPKETIEQEKQAGES  | 0.36 |
| Q15654              | Thyroid receptor-interacting protein 6 | TTASTPAGPAFPVQVKV       | 0.04 |
| P60174              | Triosephosphate isomerase              | LVGGASLKPEFVD           | 0.01 |
|                     |                                        | SLGELIGTLNA             | 0.35 |
|                     |                                        | LDPKIAVA                | 0.62 |
| Q14157              | Ubiquitin-associated protein 2-like    | VAPTSSKQH               | 0.18 |
| Q6EMK4              | Vasorin                                | VTQAREGNLPLLIAPALAA     | 0.05 |
| P08670              | Vimentin                               | GPGTASRPSSSR            | 0.05 |
|                     |                                        | SSPGGVYATRS             | 0.09 |
|                     |                                        | ASSPGGVYATRS            | 0.11 |
|                     |                                        | GPGTASRPSSS             | 0.11 |
|                     |                                        | GPGTASRPSS              | 0.13 |
|                     |                                        | SLGSALRPSTSRSL          | 0.18 |
|                     |                                        | QAQIQEQHV               | 0.21 |
|                     |                                        | YASSPGGVYATRSS          | 0.21 |
|                     |                                        | SLGSALRPSTSRSLY         | 0.23 |
|                     |                                        | SSPGGVYATRSSA           | 0.25 |
|                     |                                        | ASSPGGVYATRSS           | 0.26 |
|                     |                                        | YVTTSTRTY               | 0.26 |
|                     |                                        | YASSPGGVYATRS           | 0.26 |
|                     |                                        | RSSVPGVRL               | 0.30 |
|                     |                                        | RSSVPGVRL               | 0.30 |
|                     |                                        | TVETRDGQVINETSQHDDLE    | 0.31 |
|                     |                                        | FGGPGTASRPSSRS          | 0.31 |
|                     |                                        | SSPGGVYATRSS            | 0.31 |
|                     |                                        | SPGGVYATRSS             | 0.31 |
|                     |                                        | ASSPGGVYATRSSAVRL       | 0.33 |
|                     |                                        | ANYLDKV                 | 0.34 |
|                     |                                        | TRSSAVRL                | 0.35 |
|                     |                                        | ANYIDKV                 | 0.36 |
|                     |                                        | QVINETSQHDDLE           | 0.40 |
|                     |                                        | FGGPGTASRP              | 0.44 |
|                     |                                        | FGGPGTASRPS             | 0.45 |
|                     |                                        | ASSPGGVYATR             | 0.45 |
|                     |                                        | YVTTSTRTYS              | 0.47 |
|                     |                                        | GGPGTASRP               | 0.51 |
|                     |                                        | SSVPGVRL                | 0.57 |
|                     |                                        | SSVPGVRL                | 0.57 |
|                     |                                        | RDGQVINETSQHDDLE        | 0.60 |
|                     |                                        | MFGGPGTASRPSSS          | 0.62 |
| GGPGTASRPS          | 0.62                                   |                         |      |
| FGGPGTASRPSS        | 0.65                                   |                         |      |
| YASSPGGVYATR        | 0.65                                   |                         |      |
| GGPGTASRPSS         | 0.69                                   |                         |      |
| SLGSALRPSTSR        | 0.71                                   |                         |      |
| SYVTTSTRTY          | 0.83                                   |                         |      |
| SLYASSPGGVYATR      | 0.83                                   |                         |      |
| VETRDGQVINETSQHDDLE | 0.88                                   |                         |      |
| Q8N1W2              | Zinc finger protein 710                | QLDRLDI                 | 0.19 |



**Peptides with significantly increased levels in MG132-treated HK-2 cells (in alphabetical order)**

|        |                                                                             |                            |       |
|--------|-----------------------------------------------------------------------------|----------------------------|-------|
| Q96EL3 | 39S ribosomal protein L53, mitochondrial                                    | GDKPGADTGR                 | 1.22  |
| P04792 | Heat shock protein beta-1                                                   | SPAVAAPAYSR                | 1.37  |
| Q8WXG6 | MAP kinase-activating death domain protein                                  | HIKKCNTVRGVFVLEEFVPEIKEV   | 17.33 |
| Q9NX14 | NADH dehydrogenase [ubiquinone] 1 beta subcomplex subunit 11, mitochondrial | FDPSKIQLPEDE               | 3.33  |
| Q12816 | Trophinin                                                                   | SKGKKAASRGPNVSEISEAPLATQIV | 39.61 |
| P08670 | Vimentin                                                                    | GGPGTASRPSSS               | 1.33  |

---

<sup>a</sup> Ratio = 0.01 represents the peptides that were absent in the TGF- $\beta$ 1-treated cells, whereas Ratio = 100 denotes newly presented peptides in the TGF- $\beta$ 1-treated cells.
